# 1 **Control of Lipid Domain Organization by a Biomimetic Contractile** 2 **Actomyosin Cortex**

3  
4 Sven K. Vogel<sup>1†</sup>, Ferdinand Greiss<sup>1,2,3†</sup>, Alena Khmelinskaia<sup>1,3</sup> and Petra Schwille<sup>1</sup>  
5

6 <sup>1</sup>Max-Planck Institute of Biochemistry, Am Klopferspitz 18, D-82152 Martinsried,  
7 Germany

8 <sup>2</sup>Systems Biophysics, Physics Department, Ludwig-Maximilians-Universität  
9 München Amalienstr. 54, D-80799 Munich, Germany

10 <sup>3</sup>Graduate School of Quantitative Biosciences, Ludwig-Maximilians-University,  
11 Feodor-Lynen-Str. 25, D-81377 Munich, Germany  
12

13  
14 † Contributed equally  
15

## 16 17 **Abstract**

18 The cell membrane is a heterogeneously organized composite with lipid-protein  
19 micro-domains. The contractile actin cortex may govern the lateral organization of  
20 these domains in the cell membrane, yet the underlying mechanisms are not known.  
21 We recently reconstituted minimal actin cortices (MACs) (Vogel et al, 2013b) and  
22 here introduced phase-separated lipid membranes to the MACs to investigate effects  
23 of rearranging actin filaments on the lateral membrane organization. We found that  
24 the total contour length of the phase boundary increased upon the addition of actin  
25 filaments and reached a steady state where line tension and lateral crowding are  
26 balanced. The line tension allows myosin driven actin filament rearrangements to  
27 actively move individual lipid domains, often accompanied by their shape change,  
28 fusion or splitting. Our findings illustrate how myosin induced actin cortex  
29 remodeling in cells may control dynamic rearrangements of lipids and other  
30 molecules inside those domains without directly binding to actin filaments.  
31

32

33

34

35

36

37

38

## 39 **Introduction**

40 The spatiotemporal organization of lipids, proteins and other molecules at and within  
41 the cell membrane is pivotal for many fundamental cellular processes, such as signal  
42 transduction from the extracellular to the intracellular space (Groves & Kuriyan,  
43 2010). Recent findings over the last years suggest that the cell membrane should be  
44 considered as a heterogeneous lipid protein layer with coexisting small micro domains  
45 and clusters of lipids and proteins that are assumed to dynamically form and  
46 reorganize in response to external and internal cues (Engelman, 2005; Simons & Gerl,  
47 2010). Whether and how their spatiotemporal organization is actively regulated and  
48 maintained by the cell remains to be revealed. *In vivo and in vitro* studies suggest an  
49 important role of the eukaryotic actin cytoskeleton that directly interacts with the cell  
50 membrane via membrane-associated proteins (Heinemann et al, 2013; Murase et al,  
51 2004; Sheetz et al, 1980). Actin structures were found to mediate the lateral  
52 organization of membrane proteins (Gudheti et al, 2013) and to modulate their  
53 diffusive behavior (Heinemann et al, 2013; Honigmann et al, 2014; Murase et al,  
54 2004). Theoretical considerations have proposed a key role of the actin motor myosin  
55 for organizing and forming distinct protein and lipid micro-domains in cell  
56 membranes (Gowrishankar et al, 2012). However, direct experimental evidence for a  
57 control of micro-domains by actomyosin is still lacking.

58 In eukaryotic cells, the actin cortex is constantly rearranged by the motor protein  
59 myosin II and dozens of actin binding proteins. Therefore, reducing the complexity of  
60 experimental conditions, e.g. reducing dimensionality or exploiting a minimal  
61 biomimetic system, and utilizing microscopic techniques with a high temporal  
62 resolution is beneficial for studying these processes. Phase-separated lipid bilayers  
63 with controlled lipid compositions are well-established test beds to mimic lipid micro-  
64 domains in cell membranes and biological processes, e.g. the lateral organization of  
65 proteins that are otherwise difficult to observe *in vivo*. Ternary mixtures of lipids  
66 below their characteristic melting temperature ( $T_m$ ) can phase separate into liquid  
67 disordered ( $L_d$ ) and liquid ordered ( $L_o$ ) domains. Liu and Fletcher used phase-  
68 separated giant unilamellar vesicles (GUVs) as a model system to study the influence  
69 of branched actin networks on the miscibility transition temperature (Liu & Fletcher,  
70 2006). They reported that the formation of localized actin networks on PIP<sub>2</sub>-  
71 containing phase-separated GUVs could act as switch for the orientation of lipid

72 domain growth sites.

73 However, the effects of an actin meshwork on individual lipid domains are technically  
74 difficult to study, due to the 3-dimensional architecture of the GUVs. We therefore  
75 made use of a minimal biomimetic system of planar geometry that we recently  
76 developed (Vogel et al, 2013a; Vogel et al, 2013b) and combined the minimal actin  
77 cortex (MAC) with supported phase-separated membranes and lipid monolayers. We  
78 then visualized and studied the effects of actin filament adhesion and myosin driven  
79 rearrangements on the lateral organization of membrane domains with total internal  
80 reflection microscopy (TIRFM) and confocal spinning disk microscopy.

81

## 82 **Results**

### 83 **Actin filament partitioning on phase-separated membranes**

84 The effects of adhesion and myosin induced contraction of an actin meshwork on the  
85 lateral organization of lipid domains was studied by combining phase-separated lipid  
86 membranes with our established assay featuring contractile MACs (Vogel, 2016;  
87 Vogel et al, 2013a; Vogel et al, 2013b) (Fig. 1A). For the preparation of phase-  
88 separated lipid bilayers, a ternary lipid mixture with DOPC, DPPC and Cholesterol in  
89 a 1:2:1 molar ratio was used. Similar lipid compositions were described to form  $L_o$   
90 and  $L_d$  phases in free-standing membranes up to 30 °C (Veatch & Keller, 2003;  
91 Veatch & Keller, 2005). The low miscibility transition temperature of the mixture  
92 avoids thermal degradation of proteins and allowed us to study the phase transition  
93 behavior in the presence of actin filaments. The fluorescent probe DiD (0.03 mol%)  
94 was used to label the  $L_d$  phases (Garcia-Saez et al, 2007). The density of biotinylated  
95 actin filaments was controlled by the concentration of biotinylated lipid DSPE-  
96 PEG(2000)-Biotin (see also (Vogel, 2016; Vogel et al, 2013b)). As observed with  
97 TIRF microscopy, the membrane separated into micrometer-sized  $L_o$  and  $L_d$  domains  
98 (Fig. 1B-E) and homogenized at ~37 °C. The observed shift of 7 °C in  $T_m$  compared  
99 with studies from (Veatch & Keller, 2003) agreed with our expectations considering  
100 the interaction of lipid molecules with the mica support (Garcia-Saez et al, 2007).

101

102 The adhesion of actin filaments via neutravidin to biotinylated DSPE provided a  
103 stable link between the MAC and the lipid bilayer over a wide range of temperatures.

104 To validate the partitioning preference of all molecular components, the fluorescence  
105 signals of labeled neutravidin and actin filaments were acquired after domain  
106 formation when cooled below  $T_m$  (Fig. 1B-E). We found that both neutravidin and  
107 actin filaments partitioned into  $L_o$  phases (Fig. 1B and C). We therefore concluded  
108 that the biotinylated lipid DSPE partitioned into  $L_o$  phases, and that the concentration  
109 of Biotin-DSPE controlled the amount of bound actin filaments to the membrane in an  
110 easy and reliable manner (see also (Vogel, 2016; Vogel et al, 2013b)).

111

### 112 **Actin filament crowding effects in phase-separated minimal actin cortices**

113 We prepared low (0.01 mol % DSPE-PEG2000-Biotin) and medium (0.1 mol %  
114 DSPE-PEG2000-Biotin, Fig. 2B) dense MACs to investigate the effect of actin  
115 filament density on phase-separated membranes. To this end, the ternary lipid mixture  
116 was incubated with non-labeled neutravidin and placed on a temperature-controlled  
117 microscope objective. A fluorescence image was acquired as a reference before actin  
118 filaments were added (Fig. 2A and B, left column). A homogeneous membrane was  
119 produced by heating the microscope objective to 42 °C (above  $T_m$ ). Actin filaments  
120 were added to the membrane above  $T_m$  (Fig. 2A and B, middle column) and the  
121 sample was subsequently incubated for ~45 min at 42 °C (Fig. 2A). The membrane  
122 was completely covered by actin filaments after approximately 30 minutes (Fig. 2A  
123 and B, middle column). Finally, the membrane was slowly cooled down to 30 °C  
124 without active cooling and the fluorescence signal recorded after complete phase  
125 separation (Fig. 2A and B, right column).

126 While the low density MAC did not show any influence on membrane domain  
127 properties, the medium dense MAC caused the formation of smaller domains (Fig.  
128 2B, right column). Both, actin filaments and DSPE-PEG2000-Biotin partitioned into  
129  $L_o$  phases (Fig. 2B and D), confirming our initial partition observations (Fig. 1B - E).  
130 We conclude that actin filaments act as nucleation sites for domain formation and  
131 drive their lateral spatial distribution.

132 To investigate the relation between line tension and the binding of actin filaments, we  
133 exposed the membrane to different temperatures below  $T_m$  and added actin filaments  
134 to high density MACs containing a lipid mixture with 1.0 mol% biotinylated DSPE  
135 (Fig. 2D - F). We expected a constant binding of actin filaments at moderate  
136 temperature changes, due to the strong binding affinity of neutravidin and biotin.  
137 Indeed, we found that the integrated fluorescence intensity of labeled actin filaments

138 was independent of the base temperature (Fig. 2F). Hence, the adhesion process of  
139 actin filaments to the membrane and hence crowding is apparently constant over the  
140 employed temperature range. The line tension  $\gamma$  between  $L_o$  and  $L_d$  domains is known  
141 to be a linear function of temperature with  $\gamma \approx \gamma_0(T_c - T)/T_c$  where  $T_c$  is the critical  
142 temperature (Baumgart et al, 2003; Honerkamp-Smith et al, 2008; Veatch et al, 2008).  
143 With the temperature-independent binding, the final contour length  $L$  then increases  
144 linearly with a constant boundary energy  $E = \gamma$  as induced by the actin  
145 filaments (Yang et al, 2016).

146 Fluorescently labeled actin filaments were added to the sample chamber at various  
147 base temperatures below  $T_m$  and imaged for  $\sim 30$  min using TIRF microscopy (Fig.  
148 2D). The contour length ( $L$ ) (Fig. 2C) of membrane domains was extracted (Canny  
149 edge detection) and tracked over time (Fig. 2E). After  $\sim 1$  min of actin filament  
150 addition, first domain deformations could be observed (Fig. 2D (upper row)) and the  
151 contour length was found to grow until a steady state at  $\sim 60$  min was reached (Fig.  
152 2E). Furthermore, the final contour length increased as expected with temperature  
153 (final contour lengths:  $L_{\text{Final}} = 286.0 \pm 42.3 \mu\text{m}$  and  $\tau = 38.6 \pm 7.7$  min at  $24^\circ\text{C}$ ,  $L_{\text{Final}}$   
154  $= 518.2 \pm 3.9 \mu\text{m}$  and  $\tau = 7.6 \pm 0.2$  min at  $30^\circ\text{C}$ ,  $L_{\text{Final}} = 1104.3 \pm 4.2 \mu\text{m}$  and  
155  $\tau = 5.6 \pm 0.1$  min at  $36^\circ\text{C}$ ).

156

### 157 **Actomyosin contraction governs lateral membrane domain organization**

158 Aster shaped actomyosin clusters form *in vivo* and *in vitro* upon myosin's contractile  
159 activity (Backouche et al, 2006; Munro et al, 2004; Murrell & Gardel, 2012; Soares e  
160 Silva et al, 2011; Vogel et al, 2013b). Synthetic myofilaments contract the MAC in  
161 the presence of ATP and, hence rearrange actin filaments that eventually form stable  
162 actomyosin clusters (Fig. 3A-C; Video 1).  $L_d$  membrane domains were found to  
163 deform within minutes upon contraction, and thereby result in various splitting and  
164 fusion events of single domains (Fig. 3E; Videos 2-4).  $L_d$  domain shape changes, such  
165 as inward ingression, were observed, which correlate with the movement of  
166 actomyosin clusters against the  $L_d$  domain, thereby exerting pushing forces against the  
167 phase boundary (Fig. 3E; Videos 3 and 4). Pushing of actomyosin clusters against  
168 smaller  $L_d$  domains results in their net movement and may lead to splitting and fusion  
169 events with other  $L_d$  domains (Fig. 3E; Video 4).

170 In order to mimic free-standing membranes without support-induced friction of the

171 SLBs but keeping the technical advantages of a planar geometry, we made use of a  
172 recently developed lipid monolayer system (Chwastek & Schwille, 2013) with an air-  
173 liquid interface (Fig. 3F). Actin filaments were coupled to ternary phase-separated  
174 lipid monolayers similar to the situation in the supported lipid bilayer system via  
175 biotinylated lipids and the use of neutravidin. Contrary to the situation in the SLB  
176 system, actin filaments preferentially bind to the liquid extended (disordered) ( $L_e$ )  
177 phase where also the neutravidin anchor protein mainly partitioned to (Fig. 3F), likely  
178 due to the different lipid mixture we used here (see Material and Methods). In low and  
179 medium dense monolayer MACs the liquid condensed (ordered)  $L_c$  domains acquire  
180 circular shapes and the actin filaments close to the phase boundaries align to their  
181 circular shape (Fig. 3F). In the case of low and medium densities we expect that the  
182 line tension energy dominates over the actin filament wetting energy at the phase  
183 boundary and hence the  $L_c$  can assume an unrestricted shape with aligned actin  
184 filaments. Similar effects have been observed using bacterial cytoskeleton proteins  
185 (Arumugam et al, 2015). Having this system in hands we were now able to confirm  
186 that it is indeed active forces exerted by myosin motors on actin filaments that deform  
187 the  $L_c$  domains in the monolayer system. The addition of myosin filaments in the  
188 presence of ATP led to the contraction of the actin layers and to shape deformations  
189 and spatial rearrangements of the  $L_c$  domains by the contracting actin filaments  
190 (Video 5). The shape changes included fusion and stretching of the  $L_c$  domains  
191 (Video 5). Note that these “active” deformation forces were only exerted in the  
192 presence of myosin filaments and ATP. Interestingly, the obtained lipid domain  
193 shapes seem to be stabilized after the active contraction period, probably by the  
194 remaining actin filaments. Using the monolayer system also tells us that the frictional  
195 force caused by a solid support in SLBs does not play a significant role in the  
196 observed phenomena.

197

## 198 **Discussion**

199 As cells may need to quickly adapt the macro-and microscopic organization of lipid  
200 and protein aggregates within the cell membrane due to external or internal cues, we  
201 propose that actomyosin driven reorganization of actin filaments may aid to quickly  
202 reorganize their lateral distribution. Recent evidence exists that the presence of an  
203 actin meshwork influences the lateral diffusion behavior of lipids and proteins in

204 membranes *in vivo* (Murase et al, 2004) and *in vitro* (Heinemann et al, 2013) and that  
205 it impacts the behavior of phase-separated membranes (Honigmann et al, 2014; Liu &  
206 Fletcher, 2006). The important role of myosin is further supported by recent  
207 theoretical and *in vitro* studies (Gowrishankar et al, 2012; Koster et al, 2016). It is  
208 therefore tempting to speculate that cortical actomyosin contractility may be a generic  
209 model for eukaryotic organisms not only to control their mechanical stability and  
210 shape but also to quickly and actively control the lateral lipid and protein organization  
211 at the cell membrane.

212 In our MACs that were combined with ternary lipid mixtures we found that binding of  
213 actin filaments to a homogeneous bilayer at temperatures above  $T_m$  induced spatial  
214 alignment of  $L_o$  domains to actin bound locations upon cooling below  $T_m$  (Fig. 2).  
215 Eventually, actin filaments serve here as nucleation sites for domain formation and  
216 drive their lateral spatial distribution. We further give direct evidence that the  
217 dynamic reorganization of actin filaments by myosin motors actively changes the  
218 macroscopic organization of membrane domains in our reconstituted phase-separated  
219 lipid bilayers and monolayers. We propose that the transition energy between the  $L_d$   
220 and  $L_o$  phases (Baumgart et al, 2003; Garcia-Saez et al, 2007; Honerkamp-Smith et al,  
221 2008) enabled the lipid anchored actin filaments to exert lateral forces on the phase  
222 boundaries leading to a macroscopic motion of lipid domains that eventually resulted  
223 in splitting, fusion or deformation of the lipid domains and in their overall increase in  
224 number during and after the actomyosin contraction (Fig. 3; Videos 1-4). Our  
225 macroscopic observations may be explained with a simple model on a microscopic  
226 level. In this model we would first consider a biotinylated lipid being dragged by an  
227 actomyosin filament (Fig. 3G). The actomyosin filament would be associated with  
228 lipid phases ( $L_o$  and  $L_d$ ) having unequal viscosities. The drag is then counteracted by  
229 friction and would lead to domain deformation and rearrangement. Here, the force  
230 propagation would be independent of phase boundaries. As a second independent  
231 consideration, the biotinylated lipid would need to overcome the transition barrier  
232 between phases while being dragged over a boundary (Fig. 3G). Since our contraction  
233 experiments primarily showed that the boundaries deformed locally at actomyosin  
234 contraction sites and that actomyosin foci formed at the vicinity of phase boundaries  
235 (Fig. 3E, Videos 1-5), we consider the  $L_o \rightarrow L_d$  transition free energy  $\Delta G$  as the  
236 dictating driving force for phase deformation.

237 With an estimated line tension of 0.01 pN for a 1:2:1 DOPC:DPPC:Cholesterol

238 membrane (Baumgart et al, 2003; Garcia-Saez et al, 2007; Kuzmin et al, 2005; Veatch  
239 & Keller, 2005) and a free energy of 50 cal/mol for the  $L_o \rightarrow L_d$  transition (Almeida,  
240 2011), the energy for one lipid molecule to transition is roughly 30-fold (0.35/0.01)  
241 higher than the energy that is needed to elongate the phase boundary by 1 nm.  
242 Together with our experimental findings, we can therefore conclude that actively  
243 rearranging actin filaments will primarily lead to the deformation of membrane  
244 domains. The lateral reorganization of domains readily suggests a plausible  
245 mechanism for active lateral rearrangements of membrane components by actomyosin  
246 contractions without the need of binding directly to actin filaments.



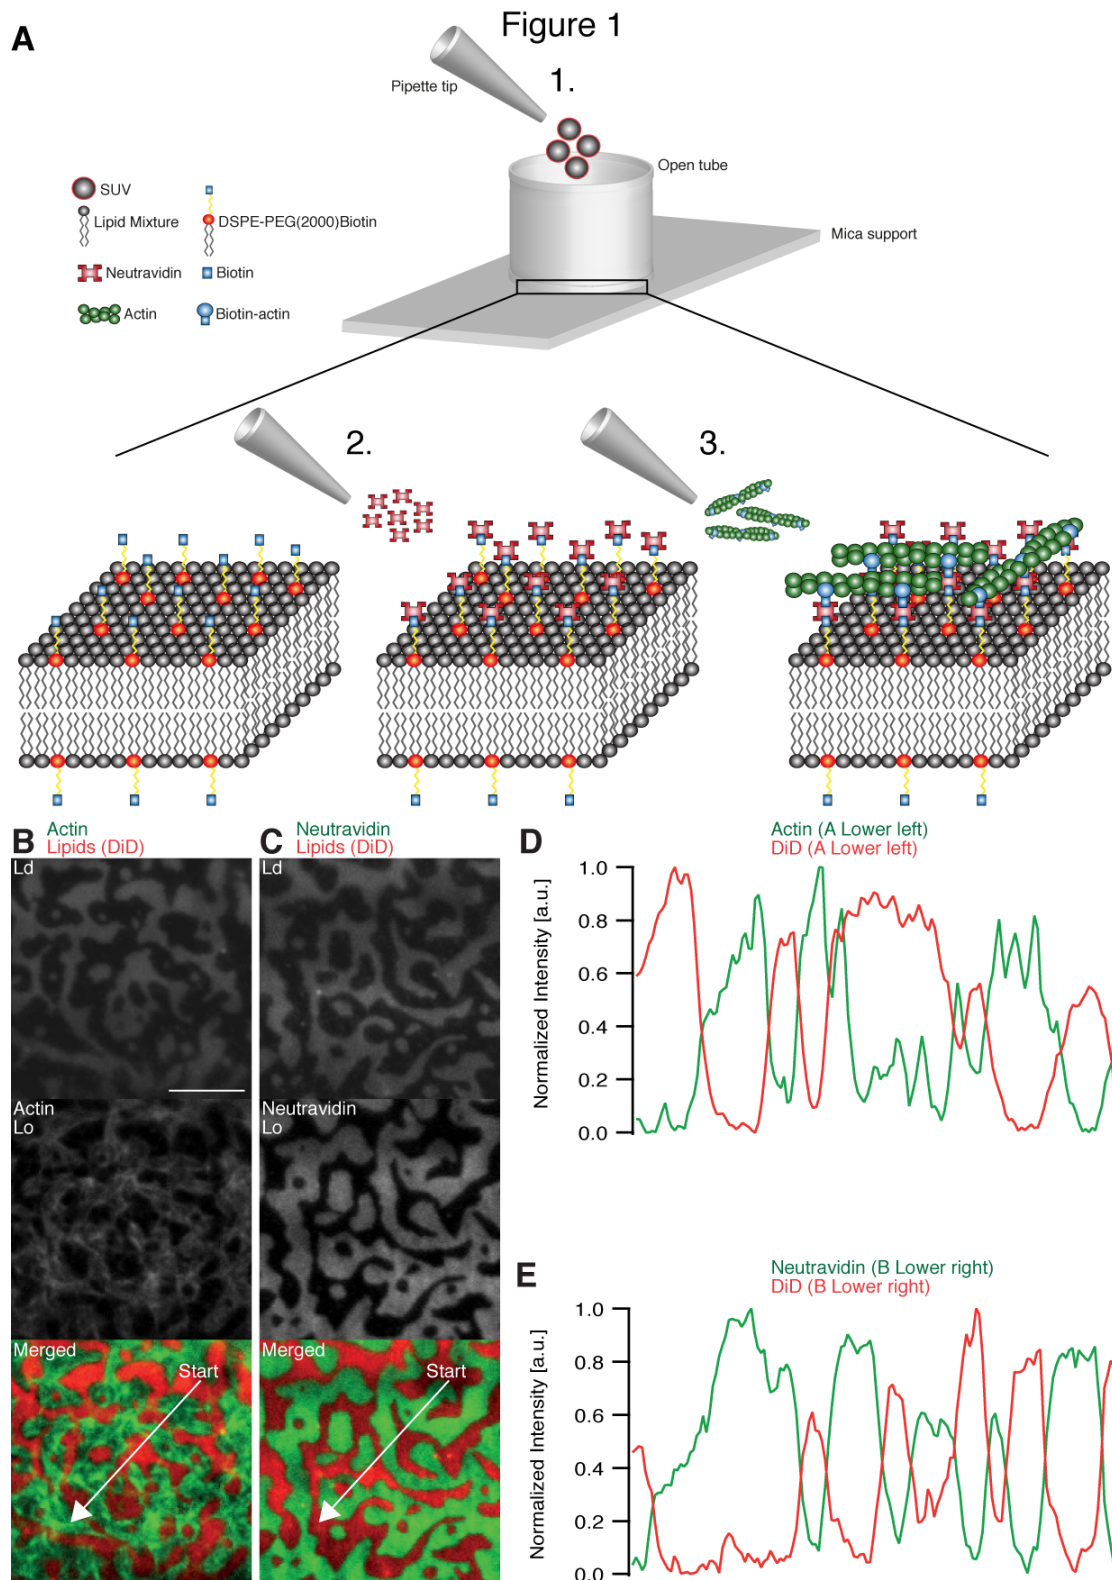

247

248 Fig. 1 Minimal actin cortex on a supported phase-separated lipid membrane. (A) Illustration depicting  
 249 the preparation of the SLB and the coupling of actin filaments to the membrane (Adapted from (Vogel  
 250 et al, 2013a)). (B) Fluorescence signal indicated the partition of DiD into  $L_d$  domains, whereas Alexa-  
 251 488-phalloidin labeled actin filaments partitioned into the  $L_o$  phase. (C) Likewise, Oregon Green  
 252 labeled Neutravidin partitioned into  $L_o$  domains. (D and E) Line profiles of the normalized  
 253 fluorescence signal of the actin cortex, DiD and Neutravidin as we measured along the superimposed  
 254 arrows in (B) and (C). Scale bar, 10  $\mu\text{m}$ .

255

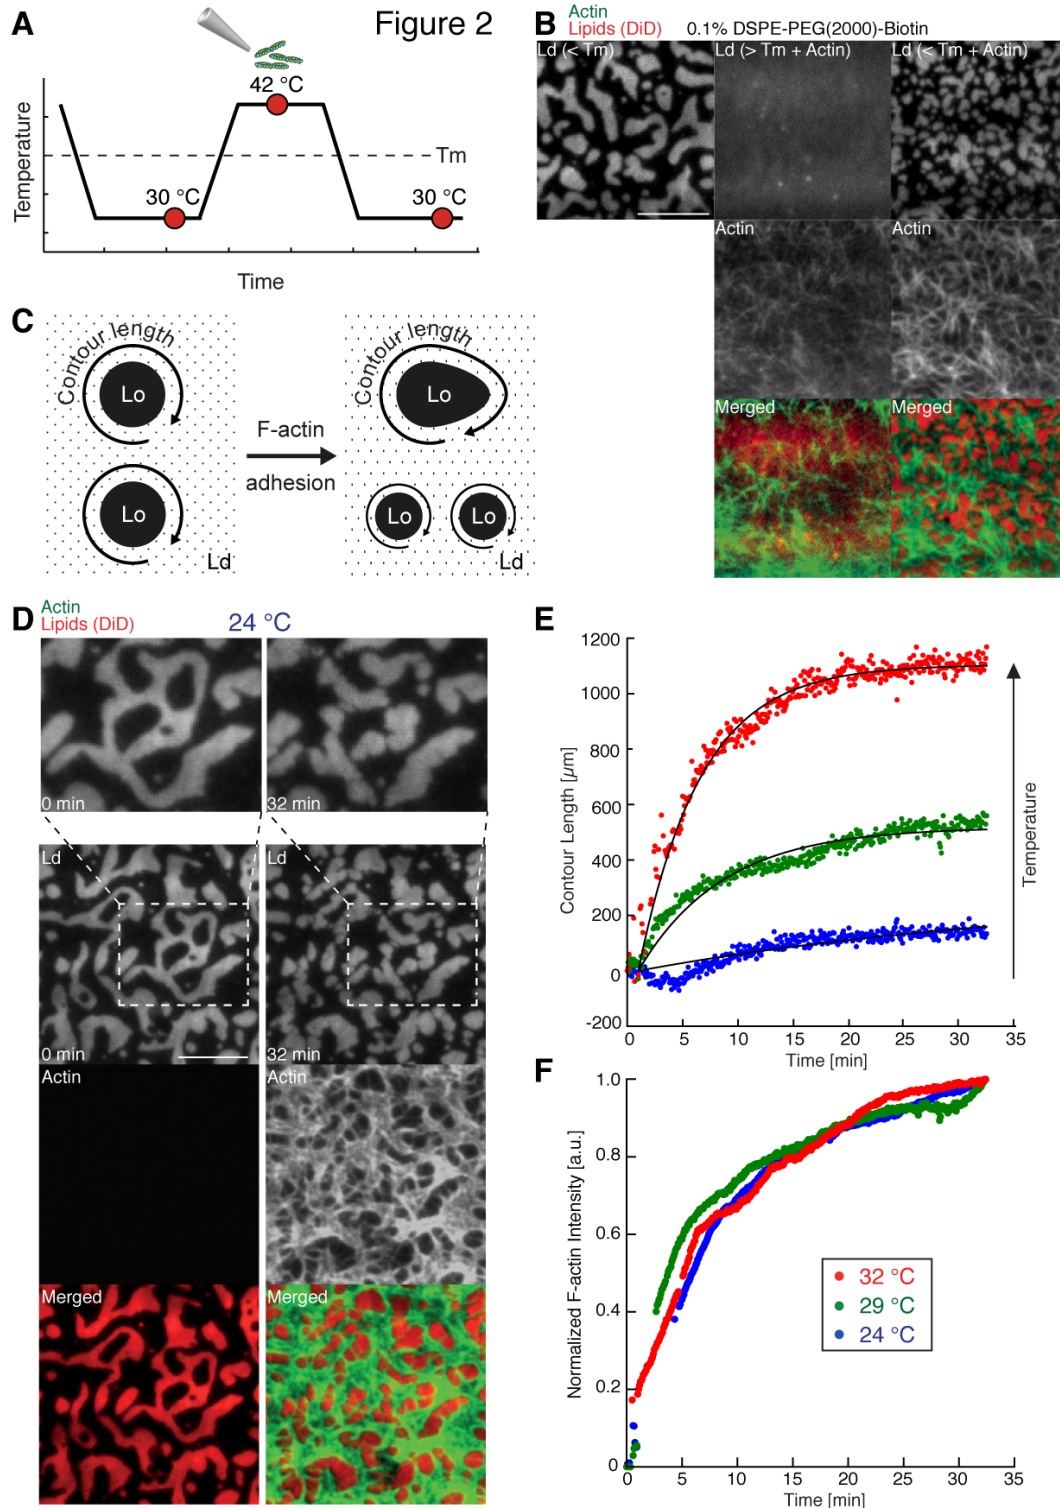

256  
 257  
 258  
 259  
 260  
 261  
 262  
 263  
 264  
 265  
 266  
 267

Fig. 2. Increase of the contour length upon actin filament binding to phase-separated membranes at various temperatures. (A) Scheme of the temperature control over time. Circles indicate points in time when fluorescent images were acquired. (B) TIRF images of a medium dense MAC (0.1 mol% DSPE-PEG2000-Biotin) with DiD labeled  $L_d$  phases are shown below  $T_m$  (30 °C) (left column), above  $T_m$  (42 °C) in the presence of bound Alexa-488-phalloidin labeled actin filaments (middle column) and below  $T_m$  (30 °C) in the presence of bound actin (right column). The size distribution of  $L_d$  domains decreased to smaller areas compared to the reference frame. (C) Sketch of the  $L_o$  domain contour lengths before and upon F-actin adhesion. (D) Example of a high density MAC (1 mol% DSPE-PEG2000-Biotin) containing DiD labeled  $L_d$  domains and actin filaments is shown before (0 min) and after the addition (32 min) of the actin filaments at 24 °C. (E) Contour length of  $L_d$  domains over time and fits at 24 °C (blue dots), 29 °C (green dots) and 32 °C (red dots). (Note that the observed local dip

268 in contour length between 2 and 5 min at 24 °C (blue dots) is due to focal misalignments and  
 269 subsequent blurring of the acquired fluorescence image after the addition of actin filaments). (F)  
 270 Normalized fluorescence signal of Alexa-488-phalloidin labeled F-actin over time at 24 °C (blue dots),  
 271 29 °C (green dots) and 32 °C (red dots). Scale bars, 10  $\mu\text{m}$ .  
 272

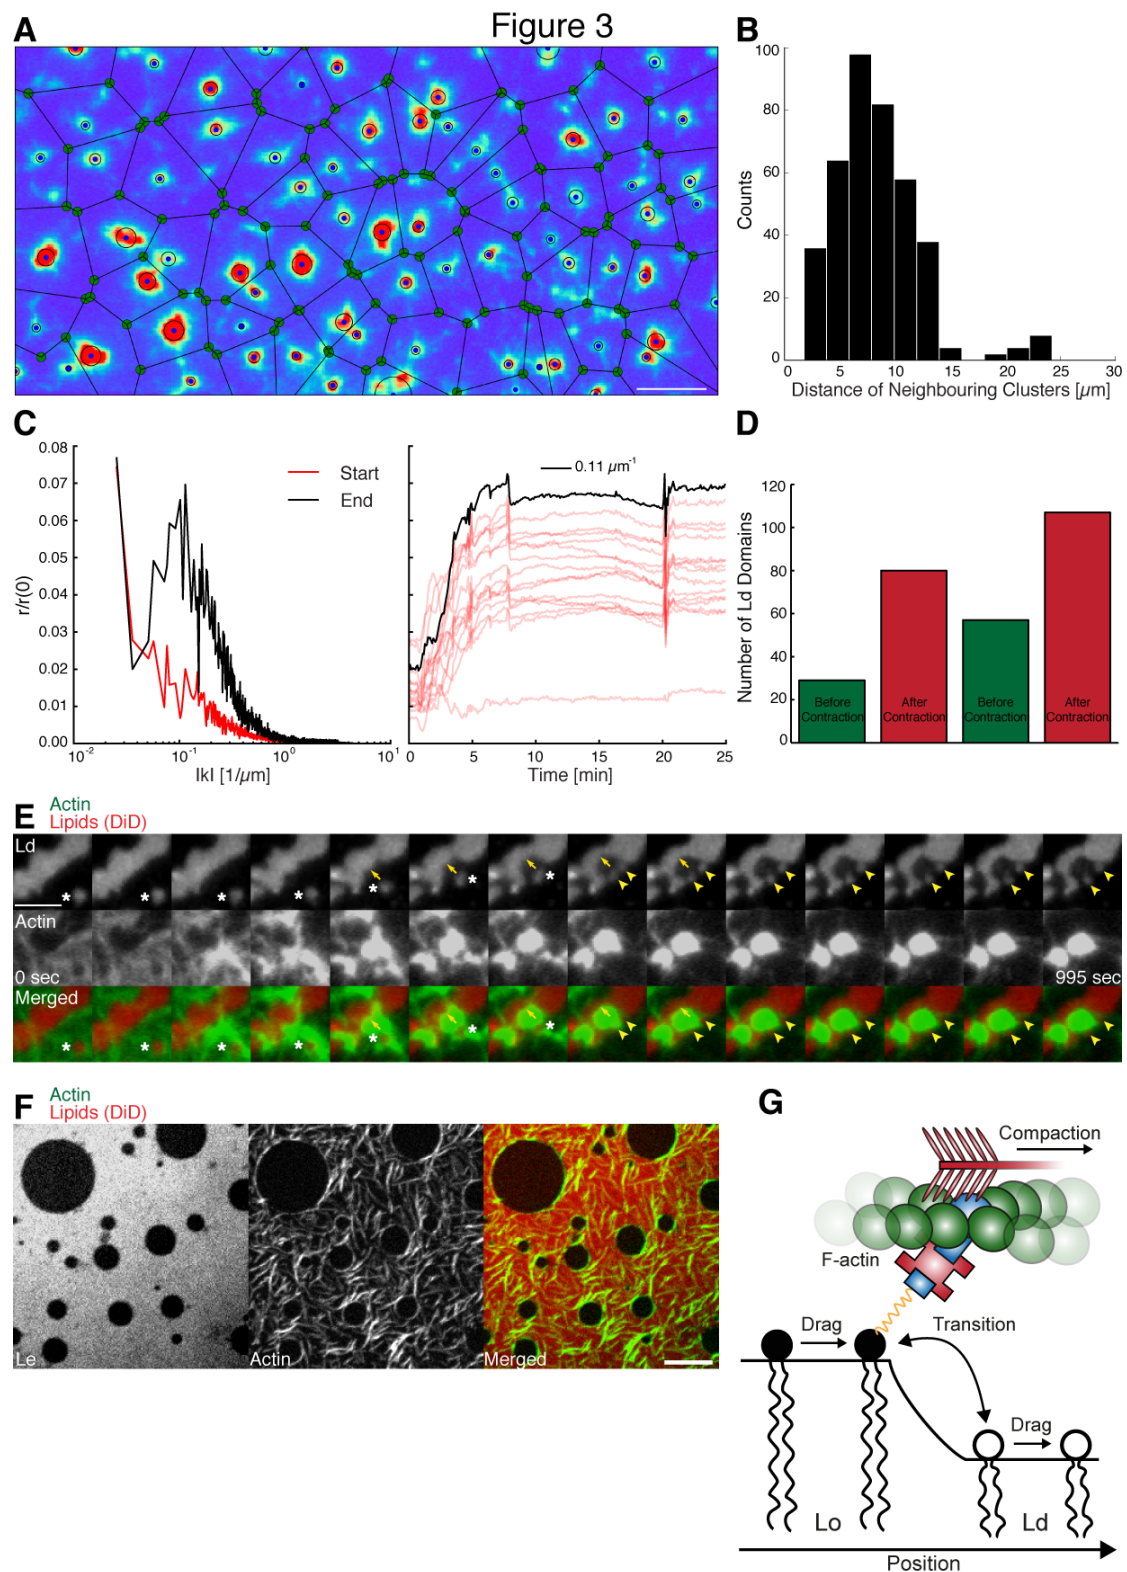

273  
 274 Fig. 3. Actomyosin contraction induces lipid domain movements and shape changes. (A and B)  
 275 Delaunay triangulation was used to find neighboring actomyosin clusters and their distance  
 276 distribution. Scale bar, 10  $\mu\text{m}$ . (C) Radially averaged 2-dimensional FFT transformation of the F-actin

277 channel revealed a maximal frequency after contraction at  $0.11 \mu\text{m}^{-1}$ . The maximal frequency matches  
278 the peak in (B). (D) Bar plot of the  $L_d$  domain number before (green bars) and after (red bars)  
279 actomyosin contraction derived from two independent representative movies. (E) TIRFM time-lapse  
280 images of DiD labeled  $L_d$  domains and Alexa-488-phalloidin labeled actin filaments in the presence of  
281 (non-labeled) myofilaments ( $0.3 \mu\text{M}$ ) showing the position (movement) of an isolated  $L_d$  domain  
282 (white asterisks) and its splitting into two separated  $L_d$  domains (yellow arrowheads). The movement of  
283 the small  $L_d$  domain correlates with an inward ingression of the larger  $L_d$  domain (yellow arrows).  
284 Scale bar,  $5 \mu\text{m}$ . (F) Confocal Spinning Disk images of Alexa-488-phalloidin labeled actin filaments  
285 coupled to a DiD labeled lipid monolayer. Scale bar,  $10 \mu\text{m}$ . (G) Scheme of a microscopic model.  
286

287

288

## 289 **Video legends**

290

### 291 ***Video 1: Myosin induced actin rearrangements in a minimal actin cortex (MAC)*** 292 ***combined with a supported phase-separated lipid bilayer***

293 MAC with a supported phase-separated membrane containing Alexa-488-phalloidin  
294 labeled actin filaments (green) exhibits dynamic rearrangements of actin filaments  
295 after the addition of myofilaments in the presence of ATP and eventually forms  
296 actomyosin clusters. The phase-separated membrane containing DiD labeled  $L_d$   
297 domains (red) is shown in the upper channel. The middle channel shows Alexa-488-  
298 phalloidin labeled actin filaments (green) that bind to the  $L_o$  domains. The lower  
299 channel shows the merge of both channels. TIRFM image sequence was acquired at 5  
300 sec. time intervals and contains 200 frames. The video is displayed at 15 frames per  
301 second (fps). Total time: 16.6 min. Scale bar,  $10 \mu\text{m}$ . (Compressed JPG avi; 10.2  
302 MB).

303

### 304 ***Video 2: Shape changes, rearrangements and fusion events of $L_d$ domains during*** 305 ***actomyosin contraction***

306 The phase-separated membrane containing DiD labeled  $L_d$  domains (red) is shown in  
307 the left channel. The middle channel shows Alexa-488-phalloidin labeled actin  
308 filaments that bind to the  $L_o$  domains. The right channel shows the merge of both  
309 channels. TIRFM image sequence was acquired at 5 sec. time intervals and contains  
310 124 frames. The video is displayed at 15 frames per second (fps). Total time: 10.3  
311 min. Scale bar,  $10 \mu\text{m}$ . (Compressed JPG avi; 0.8 MB).

312

313 ***Video 3: Splitting, shape changes and deformations of  $L_d$  domains during***  
314 ***actomyosin contraction***

315 The phase-separated membrane containing DiD labeled  $L_d$  domains (red) is shown in  
316 the left channel. The middle channel shows Alexa-488-phalloidin labeled actin  
317 filaments that bind to the  $L_o$  domains. The right channel shows the merge of both  
318 channels. TIRFM image sequence was acquired at 5 sec. time intervals and contains  
319 200 frames. The video is displayed at 15 frames per second (fps). Total time: 16.6  
320 min. Scale bar, 10  $\mu\text{m}$ . (Compressed JPG avi; 0.8 MB).

321

322 ***Video 4:  $L_d$  domain movement, splitting and ingression during actomyosin***  
323 ***contraction***

324 The phase-separated membrane containing DiD labeled  $L_d$  domains (red) is shown in  
325 the left channel. The middle channel shows Alexa-488-phalloidin labeled actin  
326 filaments that bind to the  $L_o$  domains. The right channel shows the merge of both  
327 channels. TIRFM image sequence was acquired at 5 sec. time intervals and contains  
328 200 frames. The video is displayed at 15 frames per second (fps). Total time: 16.6  
329 min. Scale bar, 5  $\mu\text{m}$ . Corresponds to Fig. 3E. (Compressed JPG avi; 0.4 MB).

330

331 ***Video 5: Shape changes and fusion events during actomyosin contraction of  $L_c$***   
332 ***domains in a MAC combined with a phase-separated lipid monolayer***

333 Myofilaments in the presence of ATP led to the contraction of the actin layers and to  
334 shape changes and fusion events of the  $L_c$  domains. The phase-separated lipid  
335 monolayer containing the DiD labeled  $L_e$  phase (red) is shown in the left channel. The  
336 middle channel shows Alexa-488-phalloidin labeled actin filaments that bind to the  $L_e$   
337 phase. The right channel shows the merge of both channels. Confocal Spinning Disk  
338 image sequence was acquired at 20 sec. time intervals and contains 64 frames. The  
339 video is displayed at 15 frames per second (fps). Total time: 21 min. Scale bar, 10  
340  $\mu\text{m}$ . (Compressed JPG avi; 1.7 MB).

341

342

343

344

## 345 **Material and Methods**

346

### 347 **Actin labeling and polymerization**

348 F-actin preparation was performed as described in (Vogel et al, 2013b). Briefly, a  
349 39.6  $\mu$ M actin solution (Actin/Actin-Biotin ratio of 5:1) was prepared by mixing  
350 rabbit skeletal actin monomers (32  $\mu$ l, 2 mg/ml, Molecular Probes) with biotinylated  
351 rabbit actin monomers (1.6  $\mu$ l, 10 mg/ml, tebu-bio/Cytoskeleton Inc.). F-buffer  
352 (1 mM DTT, 1 mM ATP, 10 mM Tris-HCl (pH 7.4), 2 mM  $MgCl_2$  and 50 mM KCl)  
353 was added to the mixture in order to start polymerization. Actin polymers were  
354 labeled and stabilized with Alexa Fluor 488 Phalloidin according to the  
355 manufacturer's protocol (Molecular Probes). Finally, the 2  $\mu$ M Alexa-488-Phalloidin  
356 labeled biotinylated actin filament solution was stored at 4  $^{\circ}C$ .

357

### 358 **MAC (minimal actin cortex) preparation**

359 1,2-dioleoyl-*sn*-glycero-3-phosphocholine (DOPC), 1,2-dipalmitoyl-*sn*-glycero-3-  
360 phosphocholine (DPPC) and cholesterol were added in a molar ratio of 1:2:1 to a final  
361 lipid concentration of 5 mg/ml (Avanti Polar Lipids, Inc). The lipid bilayer was  
362 further supplemented with 0.03 mol% DiD (Molecular Probes, Eugene, OR) and 0.01,  
363 0.1 or 1 mol% DSPE-PEG(2000)-Biotin (Avanti Polar Lipids, Inc.). The solution was  
364 dried under continuous nitrogen flux and then placed under vacuum for 1 h to remove  
365 chloroform residuals. The pellet was rehydrated in SLB buffer (150 mM KCl, 25 mM  
366 Tris-HCl, pH 7.5) by vigorous vortexing and sonication.

367 20  $\mu$ l of clear lipid suspension was then diluted in 130  $\mu$ l A-buffer (50 mM KCl, 2  
368 mM  $MgCl_2$ , 1 mM DTT and 10 mM Tris-HCl, pH 7.5) and heated to 55 $^{\circ}C$ .  
369 Meanwhile, freshly cleaved mica was fixated with immersion oil (Carl Zeiss, Jena,  
370 Germany) on a cover slip (22x22 mm, #1.5, Menzel Gläser, Thermo Fisher) and  
371 covered with the center part of a cut 1.5 mL Eppendorf tube. The Eppendorf tube was  
372 glued with UV-sensitive glue (Norland Optical Adhesive 63, Cranbury, USA). The  
373 chamber was filled with 75  $\mu$ l of small unilamellar vesicles and incubated at 55  $^{\circ}C$  for  
374 45 minutes with 1 mM  $CaCl_2$ . Non-fused vesicles were removed by washing the  
375 suspension with 2 ml warmed A-buffer and gentle pipetting. The chamber's  
376 temperature was slowly cooled. Next, 2  $\mu$ l of unlabeled or Oregon-Green labeled  
377 neutravidin (1mg/ml, Molecular Probes) diluted in 200  $\mu$ l A-buffer were added to the

378 sample and incubated for 10 min. Finally, unbound proteins were removed by gently  
379 washing the solution with 2 ml A-buffer.

### 380 **Phase separation with MAC**

381 The phase-separated membrane was heated with an objective heater (Carl Zeiss, Jena,  
382 Germany) to the setpoint of 42 °C and cooled down to 30 °C, both with and without  
383 Alexa-488-Phalloidin labeled biotinylated actin filaments. The area distribution of  
384 domains at equilibrium (45 min after 30 °C was reached) was then quantitatively  
385 compared between the different concentrations of DSPE-PEG(2000)-Biotin (0.1, 0.01  
386 mol%).

387

### 388 **Crowding-Effect**

389 The sample was placed on the TIRF microscope objective with attached objective  
390 heater and slowly warmed to the setpoint of 42 °C. The lipid bilayer with 1.0 %  
391 DSPE-PEG(2000)-Biotin was equilibrated at different temperatures below the melting  
392 point (~37 °C for 1:2:1 DOPC:DPPC:Cholesterol). 20 µl of Alexa-488-Phalloidin  
393 labeled biotinylated actin filaments were then carefully added to the chamber. Binding  
394 of actin filaments to the membrane was recorded by acquiring images in interleaved  
395 mode (488 nm and 640 nm respectively) every 2.5 seconds, generating a time-lapse  
396 movie with a 5 sec delay between subsequent images.

397

### 398 **F-actin network contraction by myofilaments**

399 After the addition of 20 µl Alexa-488-Phalloidin labeled biotinylated actin filaments to  
400 the supported lipid bilayer at room temperature (~24 °C), the mixture was incubated  
401 for approximately 45 min in order to ensure full binding of actin filaments to the  
402 membrane. Subsequently, residual actin was removed by gently exchanging the  
403 solution with 2 ml A-buffer. Once the properly assembled MAC was verified with  
404 TIRF microscopy, a solution of 20 µl myofilaments and 1 µl ATP (0.1 M) were added  
405 to start the compaction of actin filaments.

406 Images were acquired every 2.5 sec in interleaved mode, which eliminated the cross  
407 talk between color channels of actin filaments and the phase-separated membrane.

408

### 409 **TIRF microscopy**

410 Fluorescent imaging of labeled proteins and membrane was carried out on a custom-

411 built TIRF microscope. The setup was integrated into an Axiovert 200 microscope  
412 (Zeiss). The probe was illuminated and imaged through a Plan-Apochromat 100x/NA  
413 1.46 oil immersion objective with a 488-nm and 630-nm laser. Images were acquired  
414 with an Andor Solis EMCCD camera (electron gain = 300, exposure time = 50 ms,  
415 frame interval = 2.5 or 5 sec) in interleaved mode.

416

#### 417 **Data analysis**

418 Image processing, analysis and data visualization was performed with Fiji and the  
419 scientific packages for Python. Multichannel beads were used to align double-color  
420 image stacks with the Fiji plugin Descriptor-based series registration. The contour  
421 length between the lipid domains was extracted by detecting edges (Canny edge  
422 detection; (van der Walt et al, 2014)) in single fluorescent images acquired from  
423 phase-separated membranes. The contour length over time was fitted to  $L =$   
424  $L_{Final} (1 - \exp(-1/\tau (t - t_0)))$  with  $t_0 = 1$  min. The actomyosin clusters were  
425 detected using the Laplacian of Gaussian method (scikit-image (van der Walt et al,  
426 2014)) and assigned to neighbors using the Delaunay triangulation and its method  
427 `vertex_neighbor_vertices`. As supporting method, a 2-dimensional Fast Fourier  
428 Transform (FFT) algorithm was deployed in order to analyze the spatial distribution  
429 and temporal dynamics of actomyosin cluster formation.

430

#### 431 **MAC assembly on lipid monolayers**

432 The lipids DOPC, C16 sphingomyelin, cholesterol and DSPE-PEG(2000)-biotin  
433 (Avanti Polar Lipids, Alabaster, AL) in the molar ratios 42.4:42.4:14.1:1 were mixed,  
434 dried under nitrogen flux for 15 min, subsequently put into vacuum for 30 min and  
435 dissolved in chloroform (total lipid concentration of 1 mg/ml). The mixture was  
436 further diluted to a final lipid concentration of 0.1 mg/ml and labeled by addition of  
437 0.1 mol% of ATTO-655DOPE (ATTO-TEC GmbH, Siegen, Germany). The total  
438 lipid concentration was confirmed by gravimetry.

439 To form a chamber (see Scheme 1), chamber spacers were cut from a 5mm thick sheet  
440 of PTFE by a laser cutter. The spacers were sonicated step by step in acetone,  
441 chloroform, isopropanol and ethanol (15 min each). Glass cover slips of 15 mm  
442 (Gerhard Menzel GmbH, Braunschweig, Germany) were fixed to the spacer by



443 picodent twinsil<sup>®</sup> 22 two component glue (picodent<sup>®</sup>, Wipperfuerth, Germany). The  
444 chambers were washed alternately with ethanol and water, air dried and air plasma-  
445 cleaned for 10 min in order to make the glass hydrophilic. The surface was then  
446 passivated by covering the glass surface with PLL-PEG(2000) (SuSos AG,  
447 Dübendorf, Switzerland) 0.5 mg/mL solution in PBS buffer and incubated for  
448 minimum half an hour. After throughout wash with water (5 times 200  $\mu$ l) and  
449 reaction buffer (3 times 200  $\mu$ l), the chambers were ready to use.

450 Lipid monolayers were formed by drop-wise deposition of the lipid mixture on the  
451 buffer-air interface (for further details, see also (Chwastek & Schwille, 2013)). A lipid  
452 mixture volume corresponding to a lipid surface density of 70  $\text{\AA}^2$  / molecule was  
453 deposited drop-wise on the surface of the buffer solution.

454 The samples were imaged using a Yokogawa scan head CSU10-X1 spinning disk  
455 system connected to a Nikon Eclipse Ti inverted microscope (Nikon, Japan) with an  
456 Andor Ixon Ultra 512x512 EMCCD camera and a 3i solid state diode laser stack with  
457 488 nm, 561 nm and 640 nm laser lines (3il33, Denver, Colorado USA). For  
458 simultaneous Alexa-488-phalloidin and DiD excitation, the 488 nm and the 640 nm  
459 laser lines and an UPLanSApo 60x/1.20 Water UIS2 objective (Olympus, Japan) were  
460 used. The time interval between the recorded images was 20 s.

461 After confirming the formation of a phase-separated lipid monolayer by imaging,  
462 100  $\mu$ l of neutravidin solution (0.01  $\mu$ g/ $\mu$ l) was added to the sample twice and was  
463 incubated for 5 min. Note that all protein solutions or other solutions are applied  
464 directly to the liquid subphase by dipping the pipette tip through the monolayer. Next,  
465 the subphase was washed 5 times with buffer (100  $\mu$ l steps) to remove unbound  
466 neutravidin. Subsequently, 20  $\mu$ l of Alexa-488-phalloidin labeled actin filaments  
467 (2  $\mu$ M) was added to the subphase and incubated for at least 60 min, since binding of  
468 actin filaments to the interface was assumed to occur relatively slowly. When the  
469 binding of the actin filaments was confirmed by imaging, the monolayer was  
470 thoroughly washed (7 to 10 steps of 100  $\mu$ l) with reaction buffer containing 1  $\mu$ M  
471 ATP and 100  $\mu$ l of myofilaments (0.3  $\mu$ M) containing 1  $\mu$ M ATP (enzymatically  
472 regenerated see above) was added to the subphase twice. The sample was sealed by a  
473 glass cover slide with grease to avoid subphase evaporation, allowing for long sample  
474 observation. The lipid monolayer MAC system started to contract after a few minutes

475 of incubation, resulting in the formation of actomyosin clusters and deformation of  
476 the lipid domains.

477

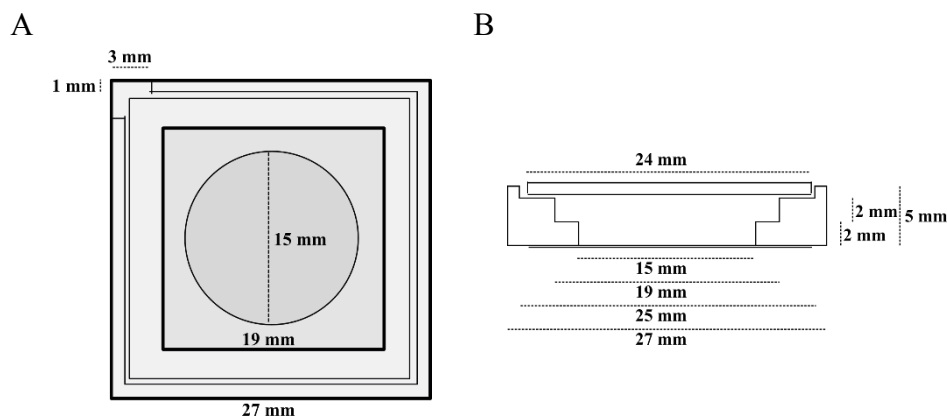

478

479

480 Scheme 1: Top (A) and lateral (B) schematic view of the PTFE chamber (adapted from (Chwastek &  
481 Schwille, 2013).

482

483

484

## 485 Acknowledgements

486 We are grateful for the financial support by the Daimler und Benz foundation (Project  
487 Grant PSBioc8216), the Gottfried Wilhelm Leibniz-Program of the DFG  
488 (SCHW716/8-1), the support of the Graduate School of Quantitative Biosciences  
489 Munich and the MaxSynBio consortium, which is jointly funded by the Federal  
490 Ministry of Education and Research of Germany and the Max Planck Society.

491

492

## 493 References

494

495 Almeida PF (2011) A Simple Thermodynamic Model of the Liquid-Ordered State and  
496 the Interactions between Phospholipids and Cholesterol. *Biophysical Journal* **100**:  
497 420-429

498

499 Arumugam S, Petrov EP, Schwille P (2015) Cytoskeletal pinning controls phase  
500 separation in multicomponent lipid membranes. *Biophys J* **108**: 1104-1113

501

502 Backouche F, Haviv L, Groswasser D, Bernheim-Groswasser A (2006) Active gels:  
503 dynamics of patterning and self-organization. *Phys Biol* **3**: 264-273

- 504  
505 Baumgart T, Hess ST, Webb WW (2003) Imaging coexisting fluid domains in  
506 biomembrane models coupling curvature and line tension. *Nature* **425**: 821-824  
507  
508 Chwastek G, Schwille P (2013) A monolayer assay tailored to investigate lipid-  
509 protein systems. *Chemphyschem* **14**: 1877-1881  
510  
511 Engelman DM (2005) Membranes are more mosaic than fluid. *Nature* **438**: 578-580  
512  
513 Garcia-Saez AJ, Chiantia S, Schwille P (2007) Effect of line tension on the lateral  
514 organization of lipid membranes. *The Journal of biological chemistry* **282**: 33537-  
515 33544  
516  
517 Gowrishankar K, Ghosh S, Saha S, C R, Mayor S, Rao M (2012) Active remodeling  
518 of cortical actin regulates spatiotemporal organization of cell surface molecules. *Cell*  
519 **149**: 1353-1367  
520  
521 Groves JT, Kuriyan J (2010) Molecular mechanisms in signal transduction at the  
522 membrane. *Nat Struct Mol Biol* **17**: 659-665  
523  
524 Gudheti MV, Curthoys NM, Gould TJ, Kim D, Gunewardene MS, Gabor KA, Gosse  
525 JA, Kim CH, Zimmerberg J, Hess ST (2013) Actin mediates the nanoscale membrane  
526 organization of the clustered membrane protein influenza hemagglutinin. *Biophys J*  
527 **104**: 2182-2192  
528  
529 Heinemann F, Vogel SK, Schwille P (2013) Lateral membrane diffusion modulated  
530 by a minimal actin cortex. *Biophys J* **104**: 1465-1475  
531  
532 Honerkamp-Smith AR, Cicuta P, Collins MD, Veatch SL, den Nijs M, Schick M,  
533 Keller SL (2008) Line tensions, correlation lengths, and critical exponents in lipid  
534 membranes near critical points. *Biophys J* **95**: 236-246  
535  
536 Honigmann A, Sadeghi S, Keller J, Hell SW, Eggeling C, Vink R (2014) A lipid  
537 bound actin meshwork organizes liquid phase separation in model membranes. *Elife*  
538 **3**: e01671  
539  
540 Koster DV, Husain K, Iljazi E, Bhat A, Bieling P, Mullins RD, Rao M, Mayor S  
541 (2016) Actomyosin dynamics drive local membrane component organization in an in  
542 vitro active composite layer. *Proc Natl Acad Sci U S A*  
543  
544 Kuzmin PI, Akimov SA, Chizmadzhev YA, Zimmerberg J, Cohen FS (2005) Line  
545 tension and interaction energies of membrane rafts calculated from lipid splay and tilt.  
546 *Biophysical Journal* **88**: 1120-1133  
547  
548 Liu AP, Fletcher DA (2006) Actin polymerization serves as a membrane domain  
549 switch in model lipid bilayers. *Biophys J* **91**: 4064-4070  
550  
551 Munro E, Nance J, Priess JR (2004) Cortical flows powered by asymmetrical  
552 contraction transport PAR proteins to establish and maintain anterior-posterior  
553 polarity in the early *C. elegans* embryo. *Developmental cell* **7**: 413-424

554  
555 Murase K, Fujiwara T, Umemura Y, Suzuki K, Iino R, Yamashita H, Saito M,  
556 Murakoshi H, Ritchie K, Kusumi A (2004) Ultrafine membrane compartments for  
557 molecular diffusion as revealed by single molecule techniques. *Biophysical journal*  
558 **86**: 4075-4093  
559  
560 Murrell MP, Gardel ML (2012) F-actin buckling coordinates contractility and  
561 severing in a biomimetic actomyosin cortex. *Proc Natl Acad Sci U S A* **109**: 20820-  
562 20825  
563  
564 Sheetz MP, Schindler M, Koppel DE (1980) Lateral mobility of integral membrane  
565 proteins is increased in spherocytic erythrocytes.  
566  
567 Simons K, Gerl MJ (2010) Revitalizing membrane rafts: new tools and insights.  
568 *Nature Reviews Molecular Cell Biology* **11**: 688-699  
569  
570 Soares e Silva M, Depken M, Stuhmann B, Korsten M, MacKintosh FC, Koenderink  
571 GH (2011) Active multistage coarsening of actin networks driven by myosin motors.  
572 *Proc Natl Acad Sci U S A* **108**: 9408-9413  
573  
574 van der Walt S, Schonberger JL, Nunez-Iglesias J, Boulogne F, Warner JD, Yager N,  
575 Guillard E, Yu T, scikit-image c (2014) scikit-image: image processing in Python.  
576 *PeerJ* **2**: e453  
577  
578 Veatch SL, Cicuta P, Sengupta P, Honerkamp-Smith A, Holowka D, Baird B (2008)  
579 Critical fluctuations in plasma membrane vesicles. *Acs Chem Biol* **3**: 287-293  
580  
581 Veatch SL, Keller SL (2003) Separation of liquid phases in giant vesicles of ternary  
582 mixtures of phospholipids and cholesterol. *Biophys J* **85**: 3074-3083  
583  
584 Veatch SL, Keller SL (2005) Miscibility phase diagrams of giant vesicles containing  
585 sphingomyelin. *Phys Rev Lett* **94**: 148101  
586  
587 Vogel SK (2016) Reconstitution of a Minimal Actin Cortex by Coupling Actin  
588 Filaments to Reconstituted Membranes. *Methods Mol Biol* **1365**: 213-223  
589  
590 Vogel SK, Heinemann F, Chwastek G, Schwille P (2013a) The design of MACs  
591 (minimal actin cortices). *Cytoskeleton (Hoboken)* **70**: 706-717  
592  
593 Vogel SK, Petrasek Z, Heinemann F, Schwille P (2013b) Myosin Motors Fragment  
594 and Compact Membrane-Bound Actin Filaments. *eLife* **2013**;2:e00116  
595  
596 Yang ST, Kiessling V, Tamm LK (2016) Line tension at lipid phase boundaries as  
597 driving force for HIV fusion peptide-mediated fusion. *Nature communications* **7**  
598  
599  
600
